# Supplementary material for: Non‐invasive prediction of fetal growth restriction by whole‐genome promoter profiling of maternal plasma DNA: a nested case–control study
Source: PubMed Central journal article supplement — BJOG. 2020 Jun 2;128(2):458–66. doi: 10.1111/1471-0528.16292 (PMC7818264; doi:10.1111/1471-0528.16292), 2020-06-02
Supplement: BJO-128-458-s001.pdf [file BJO-128-458-s001.pdf]

**Table S1.** Clinical characteristics of the study groups

|                                                   | Training cohort   |                   |         | Internal validation cohort |                   |         | External cohort 1 |                   |         | External cohort 2 |                   |         |
|---------------------------------------------------|-------------------|-------------------|---------|----------------------------|-------------------|---------|-------------------|-------------------|---------|-------------------|-------------------|---------|
|                                                   | FGR               | Control           | P-value | FGR                        | Control           | P-value | FGR               | Control           | P-value | FGR               | Control           | P-value |
| Maternal pre-gestational BMI (kg/m <sup>2</sup> ) | 20.4 ± 0.9        | 21.6 ± 0.4        | 0.029   | 21.2 ± 1.4                 | 21.1 ± 0.6        | 0.885   | 20.9 ± 1.2        | 21.5 ± 0.1        | 0.342   | 20.9 ± 0.3        | 21.5 ± 0.1        | < 0.001 |
| Maternal age (y)                                  | 31.1 ± 1.3        | 31.8 ± 0.6        | 0.351   | 31.1 ± 2.3                 | 30.9 ± 0.9        | 0.821   | 31.3 ± 1.7        | 31.4 ± 0.8        | 0.983   | 30.9 ± 1.5        | 30.9 ± 0.3        | 0.989   |
| Gestational hypertension, BP >140/90 mm Hg        |                   |                   |         |                            |                   |         |                   |                   |         |                   |                   |         |
| Yes                                               | 13(22.8%)         | 0(0%)             | /       | 1(4.0%)                    | 0(0%)             | /       | 3(7.9%)           | 0(0%)             | /       | 0(0%)             | 0(0%)             | /       |
| No                                                | 44(77.2%)         | 228(100%)         | /       | 24(96.0%)                  | 100(100%)         | /       | 35(92.1%)         | 152(100%)         | /       | 42(100%)          | 168(100%)         | /       |
| Gestational age at blood collection (wk)          | 19.2 ± 1.6(17.6*) | 18.3 ± 0.6(16.7*) | 0.260   | 16.4 ± 1.5(16.7*)          | 16.4 ± 0.7(15.7*) | 0.972   | 19.5 ± 2.1(15.8*) | 19.2 ± 0.9(17.9*) | 0.830   | 18.5 ± 1.0(17.5*) | 18.5 ± 0.5(17.4*) | 0.987   |
| Gestational age at delivery (wk)                  | 38.0 ± 2.2        | 39.4 ± 1.0        | < 0.001 | 38.9 ± 1.0                 | 39.5 ± 0.9        | 0.003   | 38.4 ± 0.7        | 39.4 ± 0.3        | < 0.001 | 38.6 ± 0.5        | 39.3 ± 0.4        | < 0.001 |

|                               |               |               |         |                |               |         |                |               |         |               |               |         |
|-------------------------------|---------------|---------------|---------|----------------|---------------|---------|----------------|---------------|---------|---------------|---------------|---------|
| Birth weight (g)              | 2247.9 ± 95.9 | 3292.2 ± 40.6 | < 0.001 | 2491.6 ± 122.2 | 3311.1 ± 55.2 | < 0.001 | 2228.9 ± 107.1 | 3289.3 ± 9.09 | < 0.001 | 2337.1 ± 52.2 | 3218.2 ± 47.4 | < 0.001 |
| Umbilical artery Doppler PI   | 0.90 ± 0.06   | 0.77 ± 0.02   | < 0.001 | 0.87 ± 0.07    | 0.77 ± 0.03   | 0.017   | 0.90 ± 0.08    | 0.75 ± 0.01   | < 0.001 | 0.86 ± 0.02   | 0.77 ± 0.01   | < 0.001 |
| Placental weight (g)          | 456.0 ± 12.6  | 539.8 ± 4.9   | < 0.001 | 503.8 ± 23.1   | 545.2 ± 6.9   | 0.001   | 447.4 ± 16.3   | 532.2 ± 2.1   | < 0.001 | 461.0 ± 3.8   | 531.0 ± 3.6   | < 0.001 |
| Birth weight/Placental weight | 4.96 ± 0.23   | 6.10 ± 0.06   | < 0.001 | 4.98 ± 0.29    | 6.08 ± 0.10   | < 0.001 | 5.01 ± 0.26    | 6.18 ± 0.03   | < 0.001 | 5.07 ± 0.09   | 6.05 ± 0.06   | < 0.001 |

\*, The median

FGR, fetal growth restriction; BMI, body mass index

Data are given as the mean ± standard deviation (SD) or n (%)

**Table S2.** Relative contribution of different types of fetal growth restriction to the total samples

| Characteristic                                              | Training cohort<br>(n=57) | Internal validation cohort<br>(n=25) | External cohort 1<br>(n=38) | External cohort 2<br>(n=42) |
|-------------------------------------------------------------|---------------------------|--------------------------------------|-----------------------------|-----------------------------|
| 3rd centile ≤ BW ≤ 10th percentile <sup>a</sup>             |                           |                                      |                             |                             |
| Prenatal evidence of<br>uterine placental<br>insufficiency* | 5(8.8%)                   | 1(4.0%)                              | 2(5.3%)                     | 0(0%)                       |
| AC < 10th centile                                           | 11(19.3%)                 | 13(52.0%)                            | 6(15.8%)                    | 10(23.8%)                   |
| Both of the above                                           | 2(3.5%)                   | 0(0%)                                | 1(2.6%)                     | 2(4.8%)                     |
| BW < 3rd centile <sup>a</sup>                               | 39(68.4%)                 | 11(44.0%)                            | 29(76.3%)                   | 30 (71.4%)                  |

<sup>a</sup> Base on the Chinese birthweight reference of Dai L et al. [16]

\*, Prenatal evidence of uterine placental insufficiency, defined as umbilical or uterine artery Doppler pulsatility index [PI] > 95th centile or absent end-diastolic flow in the umbilical artery (<32 weeks gestation) or cerebroplacental ratio (CPR; calculated as the fetal middle cerebral artery PI divided by the umbilical artery PI) <5th centile (≥32 weeks gestation)

BW, birth weight; AC, abdominal circumference

Data are given as n (%)

**Table S3.** Performance of C<sub>FGR1</sub> in first and second trimester

|                    | First trimester    | Second trimester   |
|--------------------|--------------------|--------------------|
| <b>Number</b>      | 110 (FGR:22)       | 700 (FGR:140)      |
| <b>AUC</b>         | 0.839(0.744-0.933) | 0.797(0.757-0.836) |
| <b>Accuracy</b>    | 87.9%              | 82.4%              |
| <b>Sensitivity</b> | 77.3%              | 75.0%              |
| <b>Specificity</b> | 90.4%              | 84.3%              |
| <b>P-value</b>     | 0.422              |                    |
