# Supplementary figures and images for: Non‐invasive prediction of fetal growth restriction by whole‐genome promoter profiling of maternal plasma DNA: a nested case–control study
Source: PubMed Central journal article supplement — BJOG. 2020 Jun 2;128(2):458–66. doi: 10.1111/1471-0528.16292 (PMC7818264; doi:10.1111/1471-0528.16292), 2020-06-02

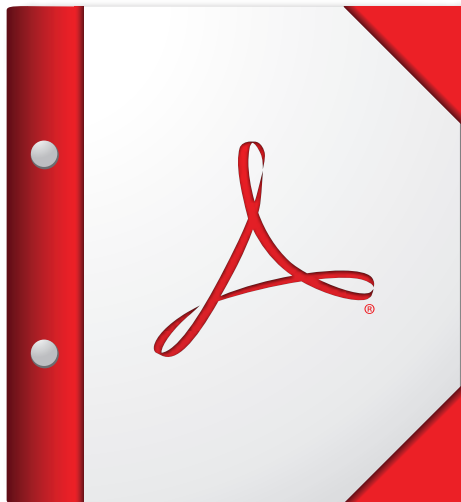

为获得最佳体验，请在 **Acrobat X**、**Adobe Reader X**  
或更高版本中打开此 **PDF** 包。

立即下载 Adobe Reader !

Supplement: BJO-128-458-s002.pdf [file BJO-128-458-s002.pdf]
